# Supplementary material
Source: publisher figshare collection journal article supplement (https://acs.figshare.com/ndownloader/files/5557058)
Supplement: Supplementary file 1 [file 5557058]

## Supporting Information

Effect-directed discovery of bioactive compounds followed by  
highly targeted characterization, isolation and identification,  
exemplarily shown for *Solidago virgaurea*

Ágnes M. Móricz<sup>1,2\*</sup>, Péter G. Ott<sup>1</sup>, Tim T. Häbe<sup>2</sup>, András Darcsi<sup>3</sup>, Andrea Böszörményi<sup>3</sup>,  
Ágnes Alberti<sup>3</sup>, Dániel Krüzselyi<sup>1</sup>, Péter Csontos<sup>4</sup>, Szabolcs Béni<sup>3</sup>, Gertrud E. Morlock<sup>2</sup>

<sup>1</sup>Plant Protection Institute, Centre for Agricultural Research, Hungarian Academy of Sciences,  
Herman O. Str. 15, 1022 Budapest, Hungary

<sup>2</sup>Interdisciplinary Research Center (IFZ) and Institute of Nutritional Science, Department of  
Food Sciences, Justus Liebig University Giessen, Heinrich-Buff-Ring 26-32, 35392 Giessen,  
Germany

<sup>3</sup>Department of Pharmacognosy, Faculty of Pharmacy, Semmelweis University, Üllői Str. 26,  
1085 Budapest, Hungary

<sup>4</sup>Institute for Soil Sciences and Agricultural Chemistry, Centre for Agricultural Research,  
Hungarian Academy of Sciences, Herman O. Str. 15, 1022 Budapest, Hungary

\*Corresponding author. Tel.: (0036) 14877515; Fax: (0036) 14877555; E-mail address:  
[moricz.agnes@agrar.mta.hu](mailto:moricz.agnes@agrar.mta.hu) (Á.M. Móricz)

## Table of contents

| No.               | Legend                                                                                                                                                                                                                                                                                                        | Page        |
|-------------------|---------------------------------------------------------------------------------------------------------------------------------------------------------------------------------------------------------------------------------------------------------------------------------------------------------------|-------------|
| <b>Table S-1</b>  | NMR spectral data and structure of Sv1 and Sv2                                                                                                                                                                                                                                                                | <b>S-3</b>  |
| <b>Figure S-1</b> | 2D-HPTLC separation for compound assignment with <i>n</i> -hexane – isopropyl acetate – acetic acid (83:14:3, v/v) for the first dimension and with <i>n</i> -hexane – acetone (17:3, v/v) for the second dimension, documented at UV 254 nm.                                                                 | <b>S-4</b>  |
| <b>Figure S-2</b> | Mass spectrum of the Sv4 zone in the negative ionization mode, showing the deprotonated molecule at <i>m/z</i> 279.                                                                                                                                                                                           | <b>S-5</b>  |
| <b>Figure S-3</b> | SPME-GC-EI-MS (a) TIC chromatogram of European golden rod root extract and (b) mass spectrum at 16.8 min that was identical to those at 16.7, 16.9 and 17.3 min.                                                                                                                                              | <b>S-6</b>  |
| <b>Figure S-4</b> | 2D-HPTLC separation for isomer proof (artefact) using <i>n</i> -hexane – acetone 17:3 (v/v) in both dimensions, documented at UV 254 nm.                                                                                                                                                                      | <b>S-7</b>  |
| <b>Figure S-5</b> | HPTLC separation of the flash chromatography fractions detected at (a) UV 254 nm and (b) after the <i>B. subtilis</i> bioassay.                                                                                                                                                                               | <b>S-8</b>  |
| <b>Figure S-6</b> | Luminometric detection ( <i>n</i> = 3) of the inhibiting activity of European golden rod root extract and its main bioactive component Sv1 against (a) luminescent <i>Pseudomonas syringae</i> pv. <i>maculicola</i> and (b) <i>Aliivibrio fischeri</i> ; their solvent ethanol was used as negative control. | <b>S-9</b>  |
| <b>Figure S-7</b> | (a) <sup>1</sup> H NMR and (b) <sup>13</sup> C NMR spectra of Sv1 containing 23% Sv2.                                                                                                                                                                                                                         | <b>S-10</b> |
| <b>Figure S-8</b> | Positive ion MS <sup>2</sup> spectrum and proposed fragmentation pattern of matricaria ester.                                                                                                                                                                                                                 | <b>S-11</b> |

**Table S-1. NMR spectral data and structure of Sv1 and Sv2**

|                    | Sv1                                                                                                                     |                       | Sv2                                                                                                                      |                       |
|--------------------|-------------------------------------------------------------------------------------------------------------------------|-----------------------|--------------------------------------------------------------------------------------------------------------------------|-----------------------|
| no.                | <sup>1</sup> H (ppm)                                                                                                    | <sup>13</sup> C (ppm) | <sup>1</sup> H (ppm)                                                                                                     | <sup>13</sup> C (ppm) |
| 1                  | -                                                                                                                       | 166.36                | -                                                                                                                        | 167.27                |
| 2                  | 6.29 (d, <i>J</i> = 11.7 Hz, 1H)                                                                                        | 131.84                | 6.38 (d, <i>J</i> = 15.9 Hz, 1H)                                                                                         | 133.40                |
| 3                  | 6.38 (dd, <i>J</i> = 11.7, 0.7 Hz, 1H)                                                                                  | 123.17                | 6.86 (dd, <i>J</i> = 15.9, 0.7 Hz, 1H)                                                                                   | 124.95                |
| 4                  | -                                                                                                                       | 78.87                 | -                                                                                                                        | 78.98                 |
| 5                  | -                                                                                                                       | 85.90                 | -                                                                                                                        | 82.81                 |
| 6                  | -                                                                                                                       | 78.50                 | -                                                                                                                        | 78.00                 |
| 7                  | -                                                                                                                       | 83.92                 | -                                                                                                                        | 83.26                 |
| 8                  | 5.66 (m, 1H)                                                                                                            | 109.66                | 5.64 (m, 1H)                                                                                                             | 109.42                |
| 9                  | 6.29 (m, 1H)                                                                                                            | 145.14                | 6.30 (m, 1H)                                                                                                             | 145.69                |
| 10                 | 1.93 (dd, <i>J</i> = 6.9, 1.7 Hz, 3H)                                                                                   | 16.64                 | 1.92 (dd, <i>J</i> = 6.6, 1.7 Hz, 3H)                                                                                    | 16.76                 |
| 11                 | 3.762 (s, 3H)                                                                                                           | 52.10                 | 3.758 (s, 3H)                                                                                                            | 52.50                 |
| structure and name | 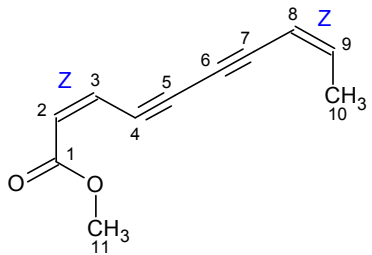 <p><b>2Z,8Z-matricaria ester</b></p> |                       |  <p><b>2E,8Z-matricaria ester</b></p> |                       |

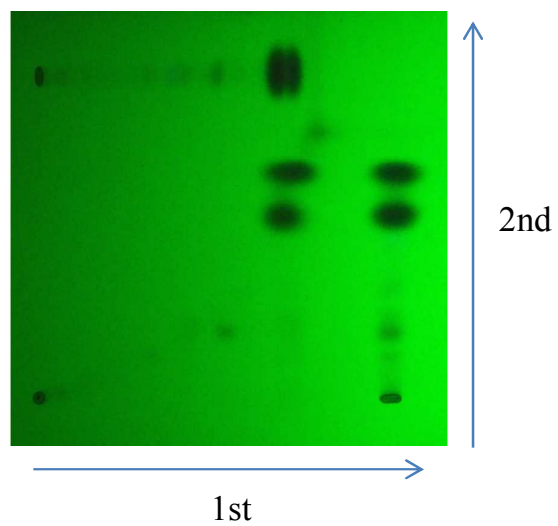

**Figure S-1.** 2D-HPTLC separation for compound assignment with *n*-hexane – isopropyl acetate – acetic acid (83:14:3, v/v) for the first dimension and *n*-hexane – acetone (17:3, v/v) for the second dimension, documented at UV 254 nm.

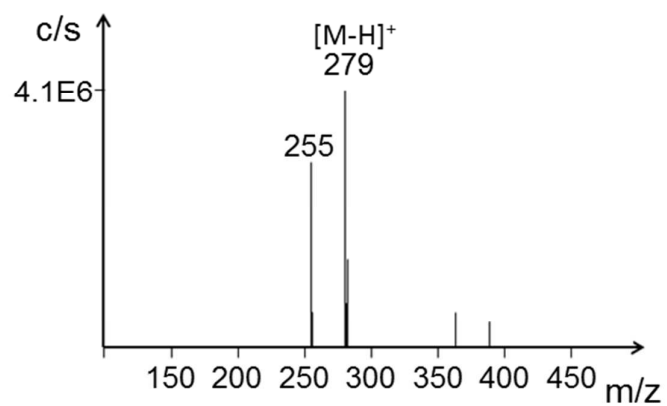

**Figure S-2.** Mass spectrum of the Sv4 zone in the negative ionization mode, showing the deprotonated molecule at  $m/z$  279.

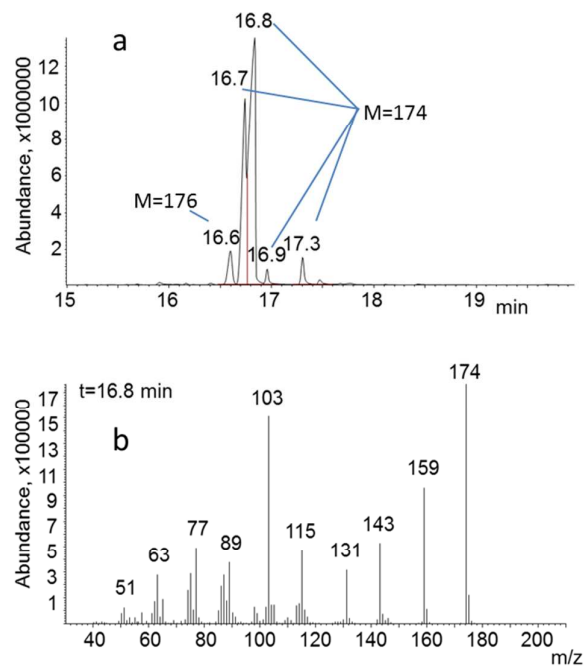

**Figure S-3.** SPME-GC-EI-MS (a) TIC chromatogram of European golden rod root extract and (b) mass spectrum at 16.8 min that was identical to those at 16.7, 16.9 and 17.3 min.

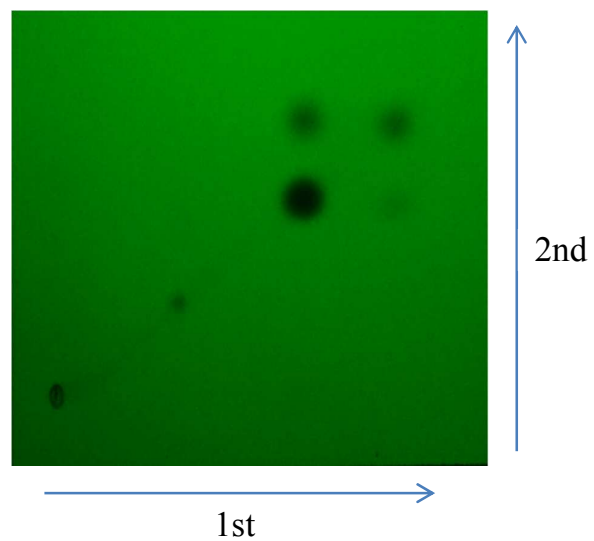

**Figure S-4.** 2D-HPTLC separation for isomer proof (artefact) using *n*-hexane – acetone 17:3 (v/v) in both dimensions, documented at UV 254 nm.

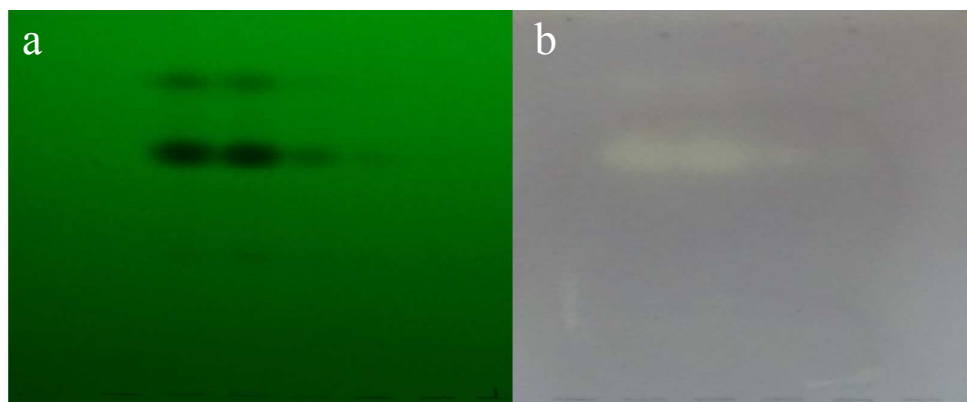

**Figure S-5.** HPTLC separation of the flash chromatography fractions, detected at (a) UV 254 nm and (b) after the *B. subtilis* bioassay.



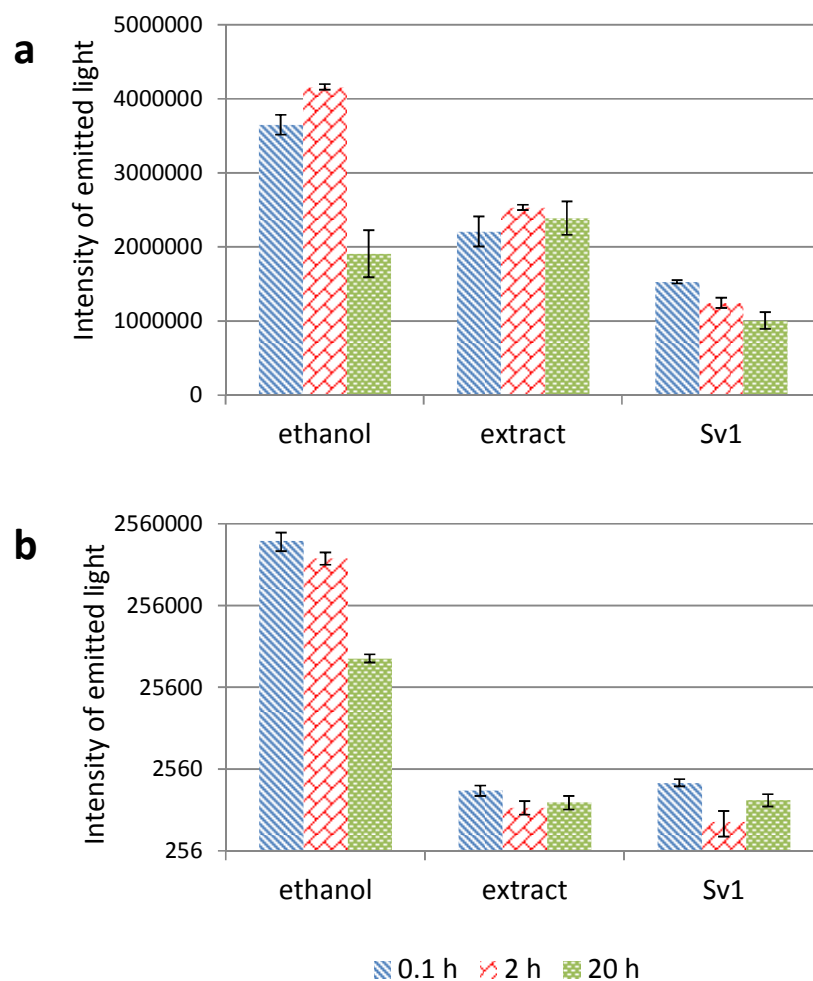

**Figure S-6.** Luminometric detection ( $n = 3$ ) of the inhibiting activity of European golden rod root extract and its main bioactive component Sv1 against (a) luminescent *Pseudomonas syringae* pv. *maculicola* and (b) *Aliivibrio fischeri*; their solvent ethanol was used as negative control.

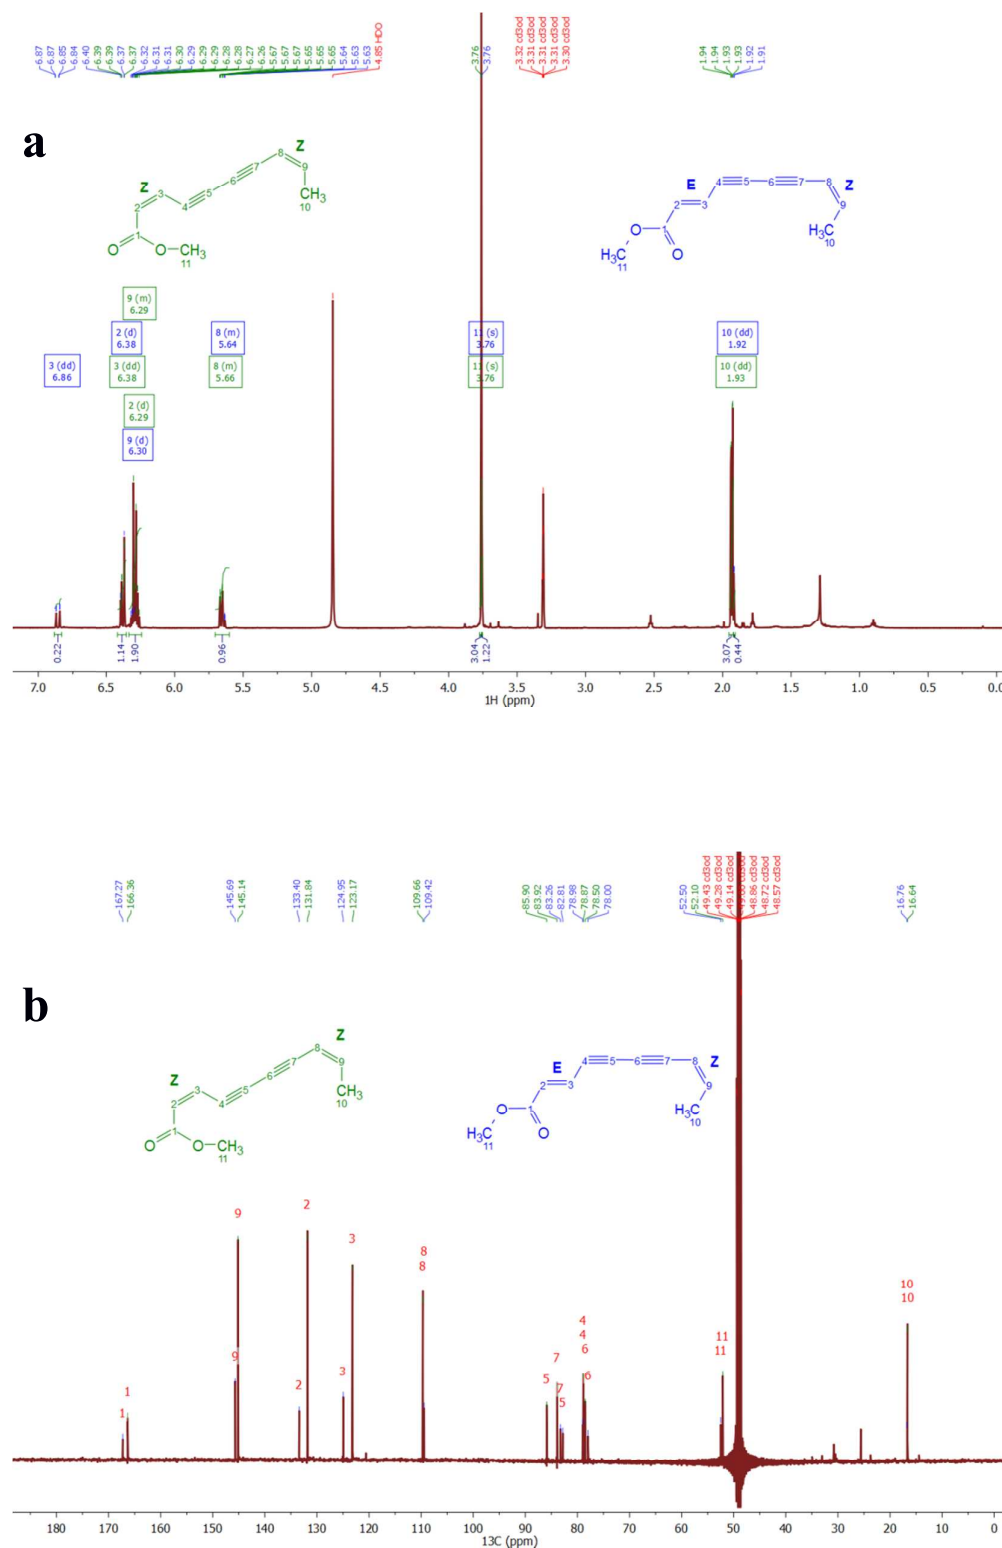

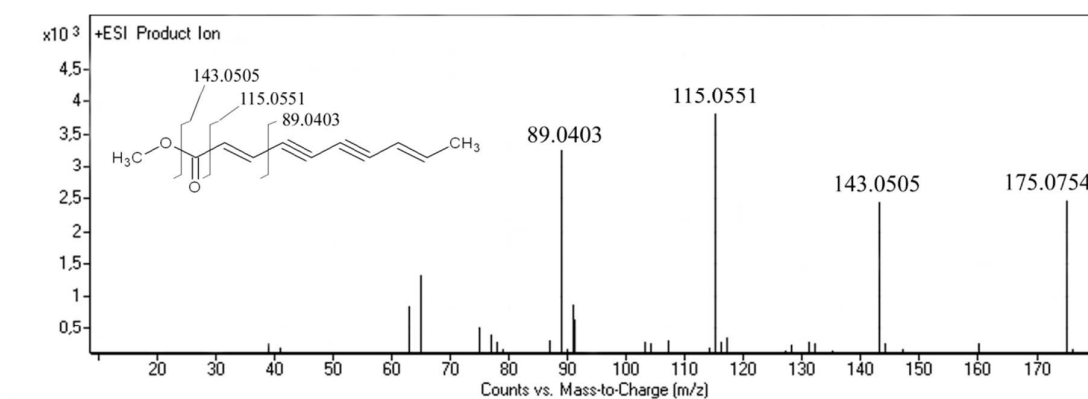

**Figure S-8.** Positive ion MS<sup>2</sup> spectrum and proposed fragmentation pattern of matricaria ester.
